# Supplementary material for: Two dysprosium-incorporated tungstoarsenates: synthesis, structures and magnetic properties
Source: Royal Society of Chemistry journal article supplement (doi:10.1039/c2dt12277d), 2012-01-01
Supplement: c2dt12277d.pdf [file c2dt12277d.pdf]

### Electronic supplementary information

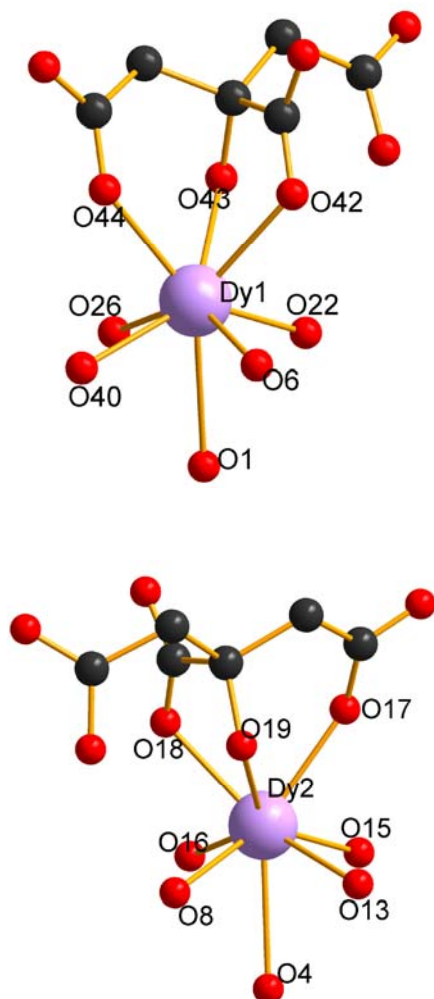

**Fig. S1** The coordination environments of Dy1 and Dy2 atoms in compound **1**.

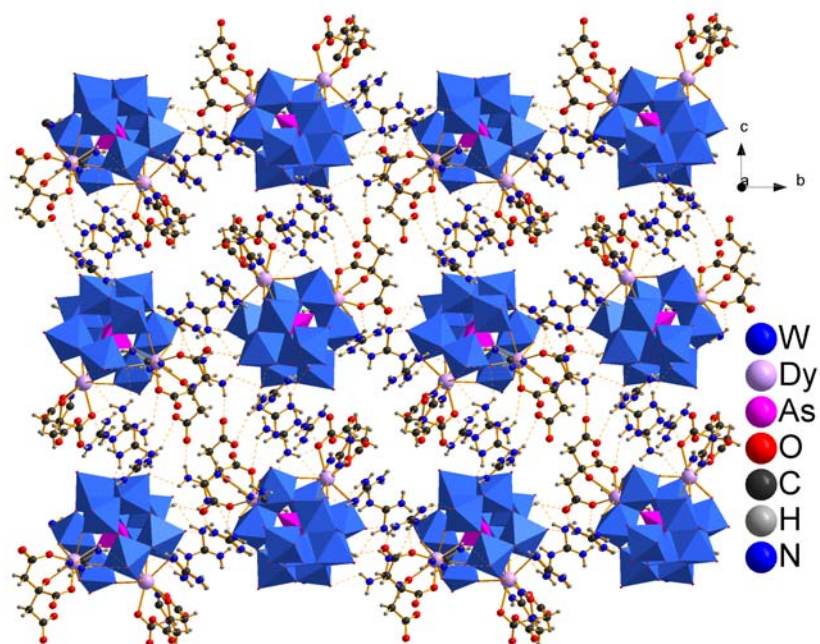

**Fig. S2** 3-D packing arrangement of **1**.

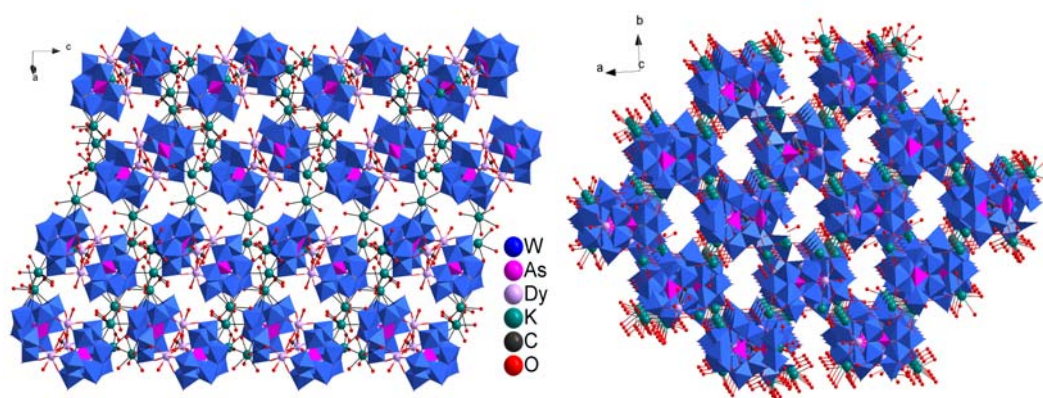

**Fig. S3** Left: 2-D layer view of **2** linked by K ions. Right: 3-D packing arrangement of **2** with 1-D channels viewed along *c*-axis. The polyanions are represented polyhedrally; Dy and K ions are shown with ball. The water molecules are omitted for clarity.

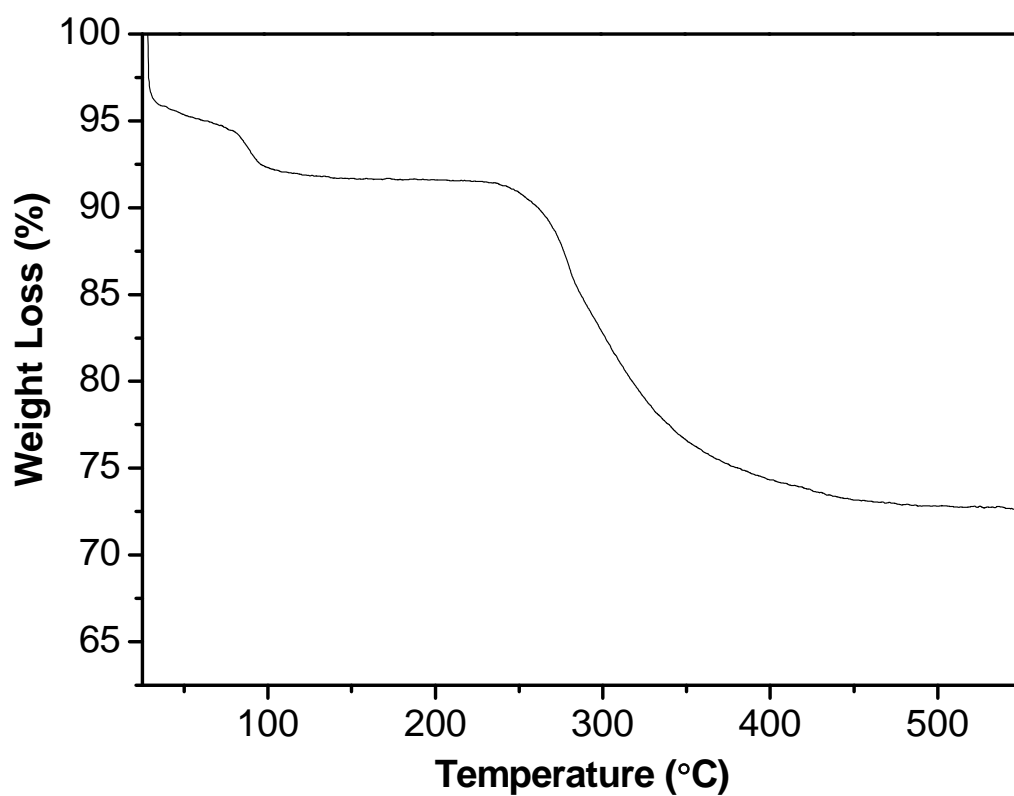

Fig. S4 TG curve of compound 1.

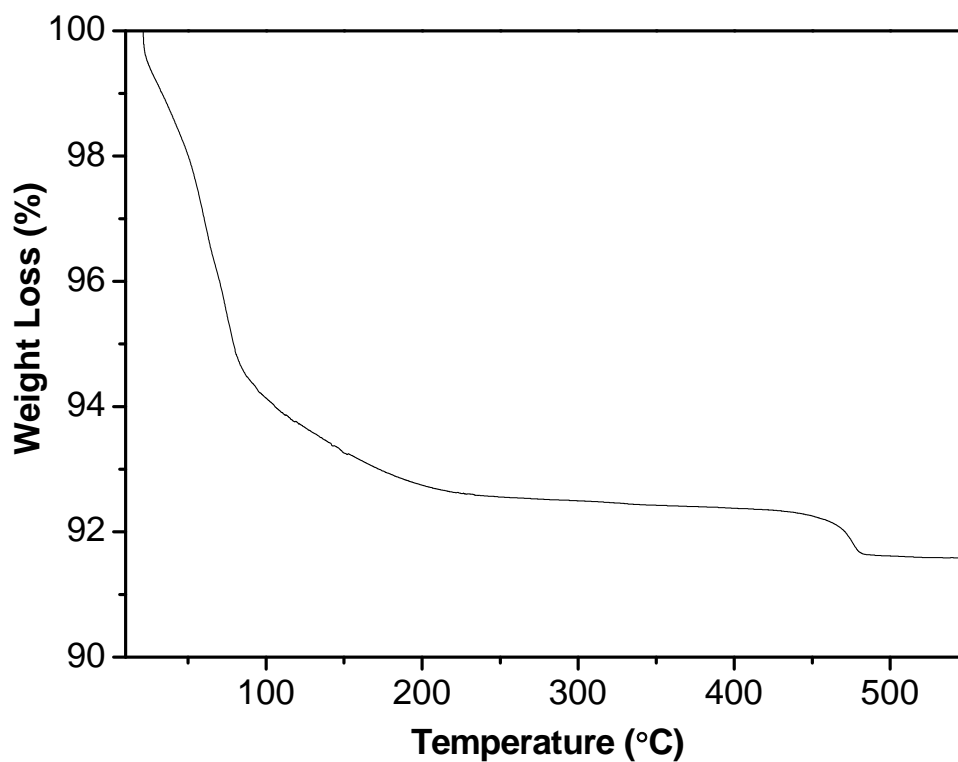

Fig. S5 TG curve of compound 2.

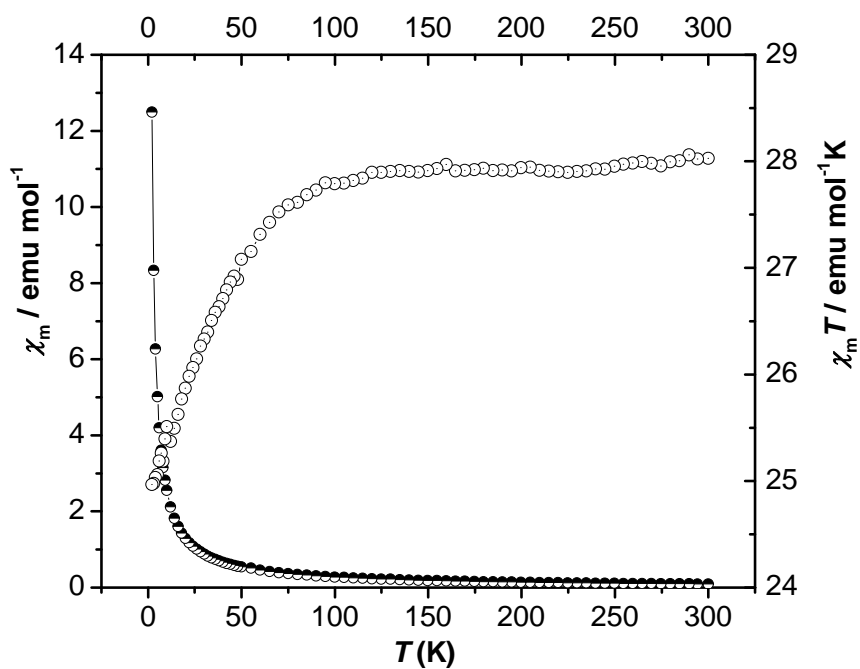

**Fig. S6** Plots of  $\chi_m T$  versus  $T$  and  $\chi_m$  versus  $T$  from 2 to 300 K for **1** an applied field of 1000 Oe.

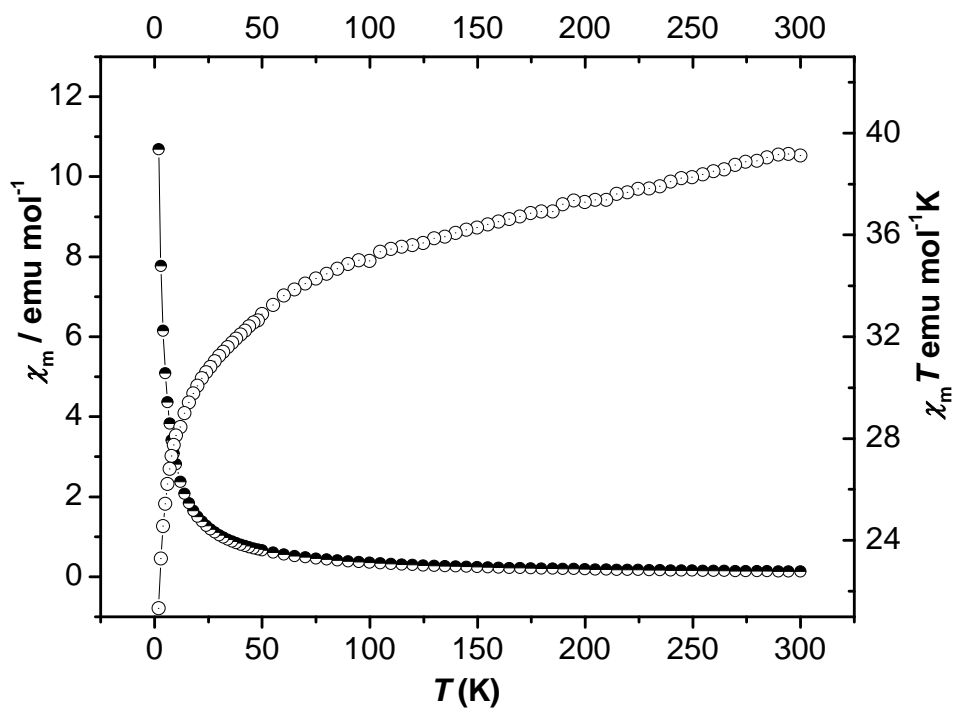

**Fig. S7** Plots of  $\chi_m T$  versus  $T$  and  $\chi_m$  versus  $T$  from 2 to 300 K for **2** an applied field of 1000 Oe.

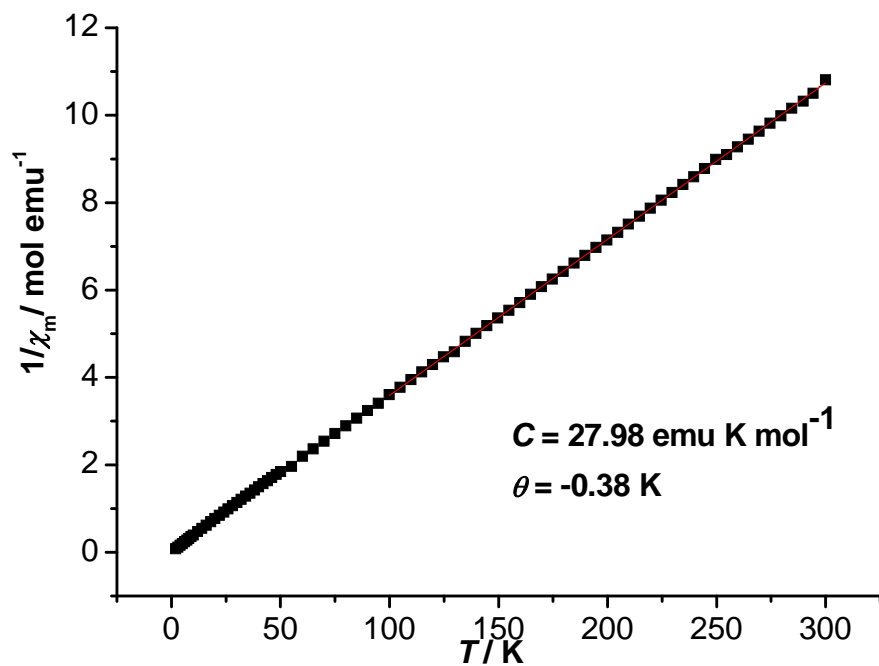

**Fig. S8** Temperature dependence of  $\chi_m^{-1}$  for **1**. The solid line is the fit of Curie-Weiss law.

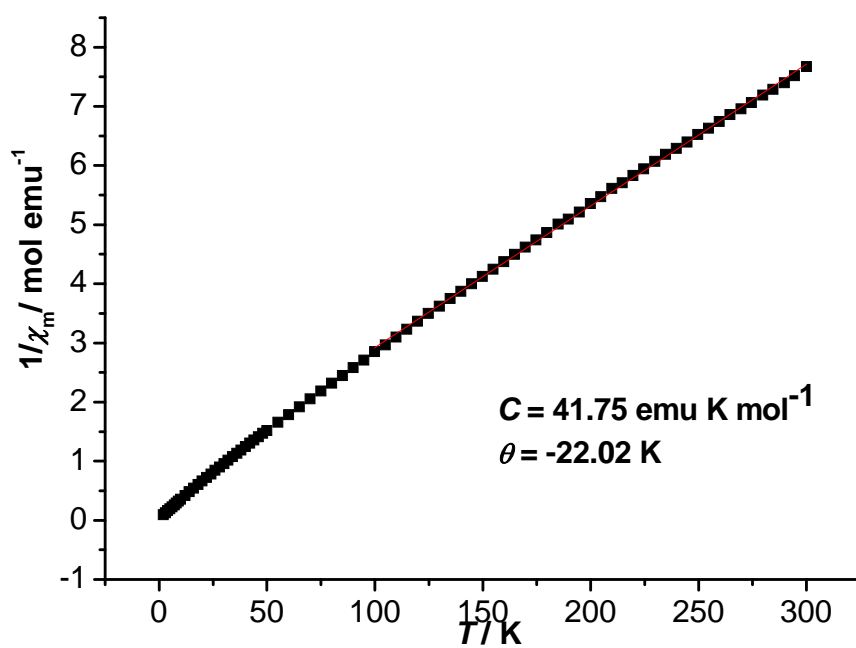

**Fig. S9** Temperature dependence of  $\chi_m^{-1}$  for **2**. The solid line is the fit of Curie-Weiss law.

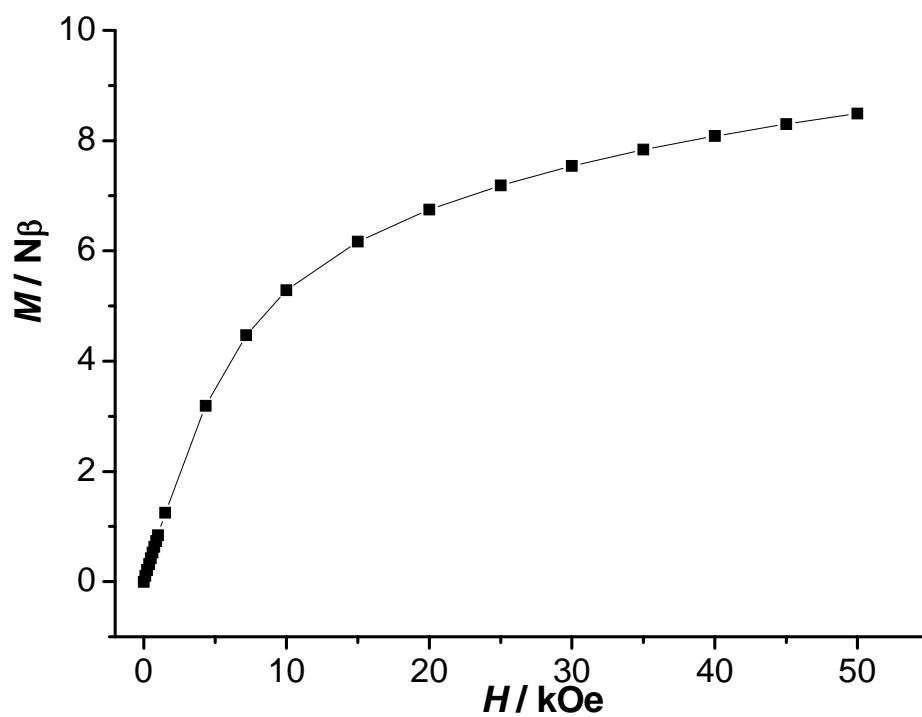

Fig. S10 Magnetisation versus applied field at 2 K for compound 1.

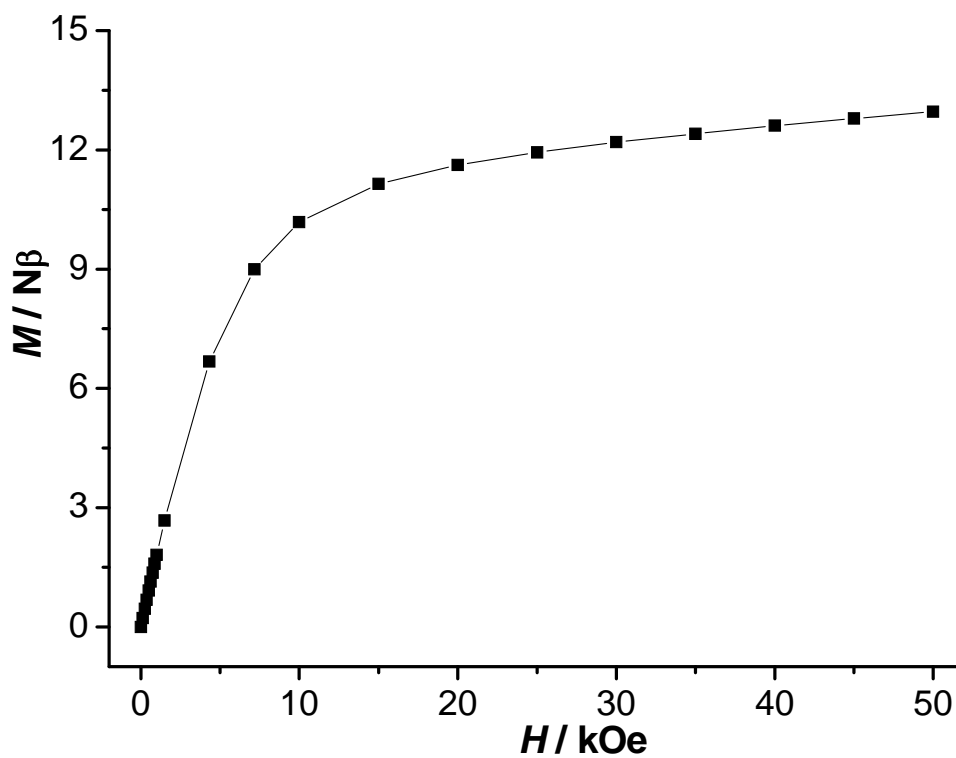

Fig. S11 Magnetisation versus applied field at 2 K for compound 2.

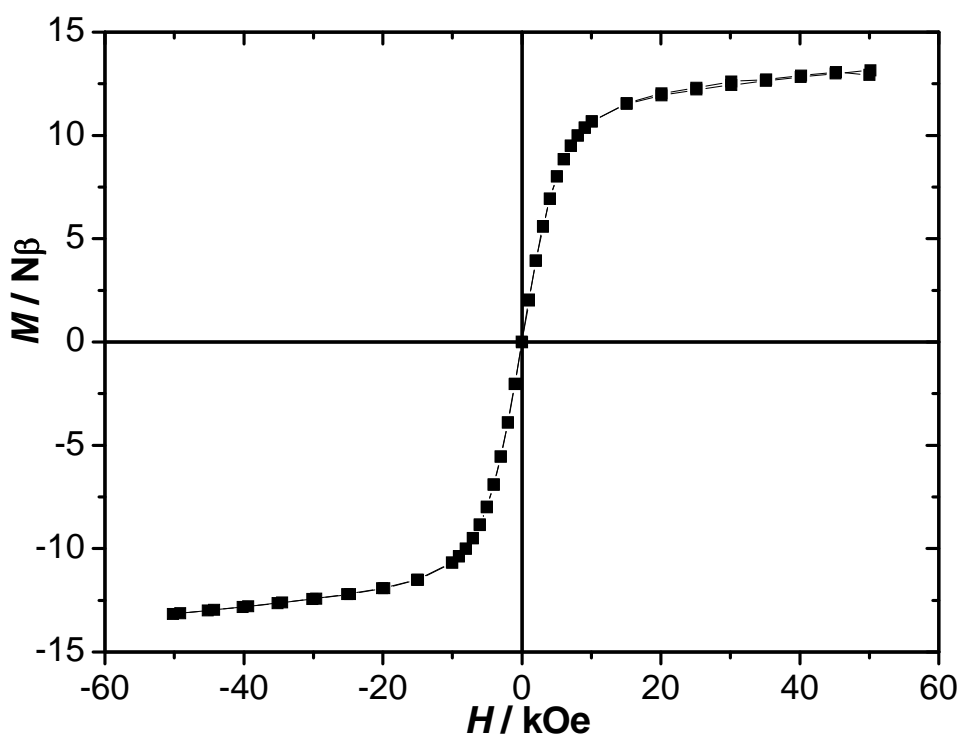

**Fig. S12** Hysteresis loop at 2 K for compound 2.

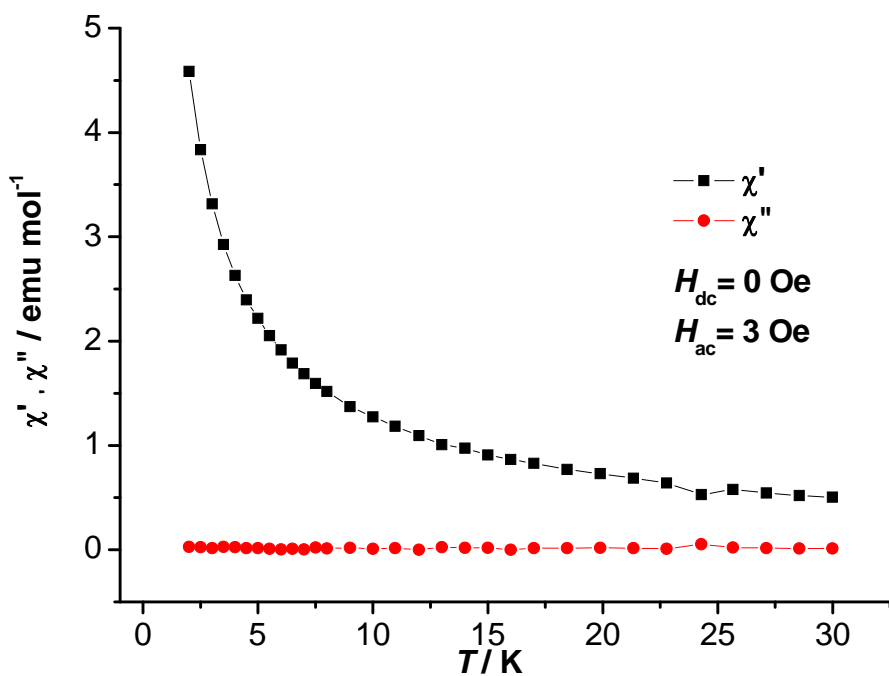

**Fig. S13** Temperature dependence of the real (top) and imaginary (bottom) components of the ac susceptibility in zero applied static field with an oscillating field of 3 Oe at a frequency of 1000 Hz for compound 1.

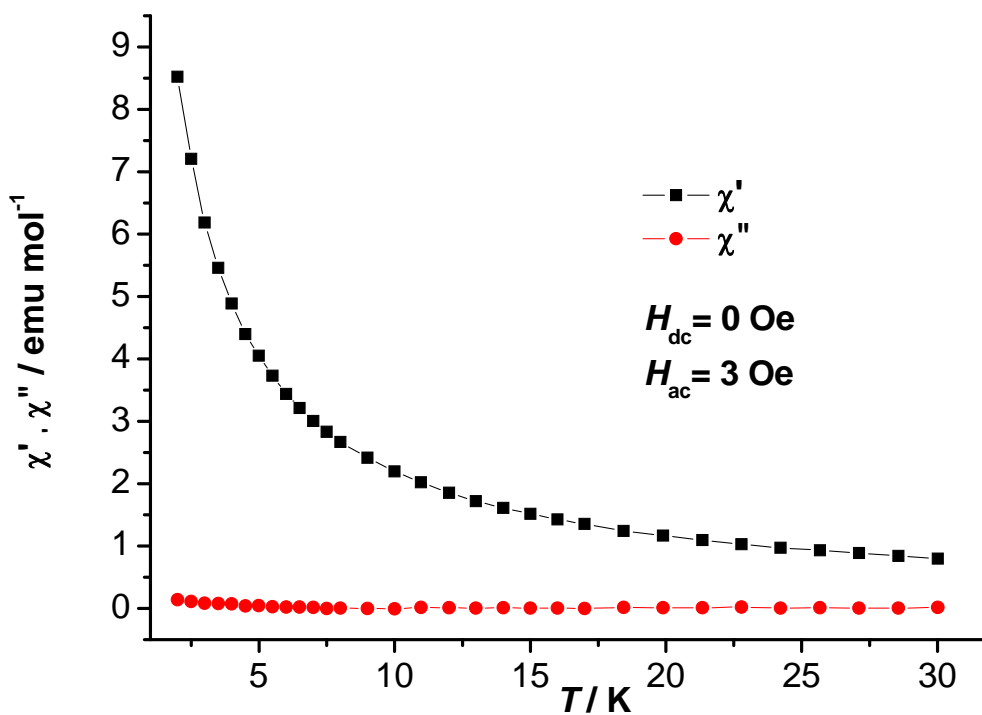

**Fig. S14** Temperature dependence of the real (top) and imaginary (bottom) components of the ac susceptibility in zero applied static field with an oscillating field of 3 Oe at a frequency of 1000 Hz for compound **2**.

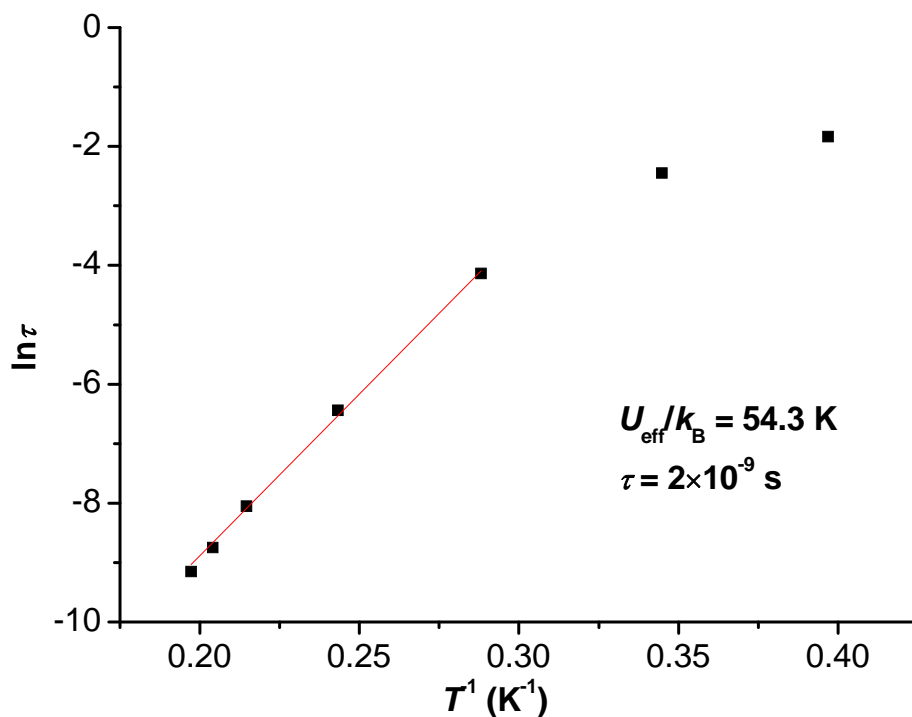

**Fig. S15** Plot of the natural logarithm of the relaxation time  $\tau$  against the inverse of the temperature  $T$  for **2**. The solid line is a fit of the Arrhenius law to indicated parameters of **2**.



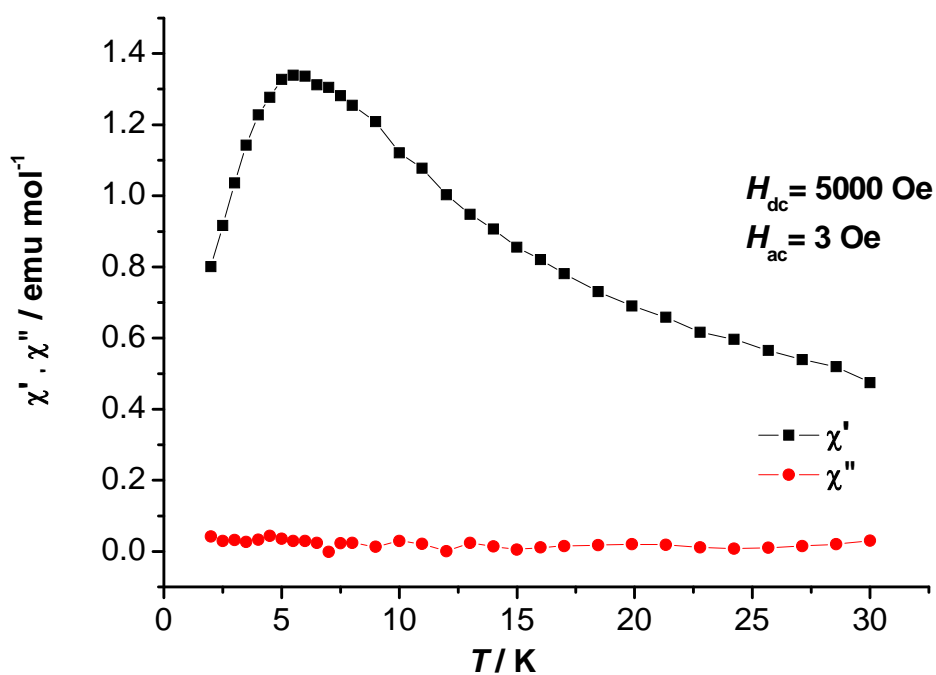

**Fig. S16** Frequency dependence of AC susceptibility at 5 kOe applied static field with an oscillating field of 3 Oe at a frequency of 1000 Hz for compound **1**. The lines are guides.
